# Supplementary material for: Confirmed COVID-19 Cases per Economic Activity during Autumn Wave in Belgium
Source: MDPI journal article supplement (doi:10.3390/ijerph182312489), 2021-11-27
Supplement: s1 [file s1]

# Supplementary Material to Confirmed COVID-19 cases per economic activity during Autumn wave in Belgium

## Supplementary Tables

**Table S1.** 14-Day incidence of COVID-19 in sectors with minimum 10,000 employees at Level 1 on both periods prior to the 19th October non-pharmaceutical interventions

| 29 September–12 October 2020                                         |           |                |                     |
|----------------------------------------------------------------------|-----------|----------------|---------------------|
| DESCRIPTION                                                          | NACE Code | Employees      | Incidence (95%CI)   |
| Arts, entertainment and recreation                                   | R         | 60382          | 785(718;859)        |
| Accommodation and food service activities                            | I         | 219468         | 714(680;750)        |
| Human health and social work activities                              | Q         | 588348         | 678(657;699)        |
| Public administration and defence; compulsory social security        | O         | 542270         | 608(588;629)        |
| Education                                                            | P         | 531993         | 597(577;618)        |
| Other service activities                                             | S         | 81336          | 584(534;639)        |
| <b>All sectors</b>                                                   |           | <b>4390750</b> | <b>573(566;580)</b> |
| Real estate activities                                               | L         | 24599          | 561(475;662)        |
| Financial and insurance activities                                   | K         | 125758         | 528(489;570)        |
| Wholesale and retail trade; repair of motor vehicles and motorcycles | G         | 634221         | 526(508;544)        |
| Administrative and support service activities                        | N         | 350493         | 507(484;531)        |
| Electricity, gas, steam and air conditioning supply                  | D         | 21032          | 504(417;609)        |
| Information and communication                                        | J         | 124635         | 479(442;519)        |
| Professional, scientific and technical activities                    | M         | 199790         | 476(447;507)        |
| Transportation and storage                                           | H         | 272414         | 464(439;490)        |
| Water supply; sewerage; waste management and remediation activities  | E         | 35281          | 445(381;520)        |
| Construction                                                         | F         | 226328         | 433(407;461)        |
| <b>General population</b>                                            |           |                | <b>423</b>          |
| Manufacturing                                                        | C         | 542636         | 387(371;404)        |
| Agriculture, forestry and fishing                                    | A         | 40373          | 161(126;205)        |
| 6–19 October 2020                                                    |           |                |                     |
| DESCRIPTION                                                          | NACE Code | Employees      | Incidence (95%CI)   |
| Human health and social work activities                              | Q         | 587069         | 1358(1329;1388)     |
| Arts, entertainment and recreation                                   | R         | 62169          | 1266(1181;1357)     |

|                                                                         |   |                |                        |
|-------------------------------------------------------------------------|---|----------------|------------------------|
| Public administration and defence;<br>compulsory social security        | O | 556718         | 1206(1177;1235)        |
| Real estate activities                                                  | L | 24568          | 1205(1076;1349)        |
| Accommodation and food service activities                               | I | 223310         | 1202(1158;1248)        |
| Education                                                               | P | 542963         | 1193(1164;1222)        |
| <b>All sectors</b>                                                      |   | <b>4390832</b> | <b>1178(1168;1188)</b> |
| Electricity, gas, steam and air conditioning supply                     | D | 21026          | 1122(989;1274)         |
| Other service activities                                                | S | 81781          | 1103(1034;1177)        |
| Financial and insurance activities                                      | K | 124922         | 1058(1003;1117)        |
| Wholesale and retail trade;<br>repair of motor vehicles and motorcycles | G | 638003         | 965(942;990)           |
| Professional, scientific and technical activities                       | M | 198992         | 926(885;969)           |
| Administrative and support service activities                           | N | 354068         | 913(882;944)           |
| Information and communication                                           | J | 125087         | 909(858;963)           |
| Water supply; sewerage;<br>waste management and remediation activities  | E | 35462          | 863(772;965)           |
| Transportation and storage                                              | H | 274308         | 847(814;882)           |
| Construction                                                            | F | 226163         | 821(784;859)           |
| <b>General population</b>                                               |   |                | <b>816</b>             |
| Manufacturing                                                           | C | 547403         | 741(719;764)           |
| Agriculture, forestry and fishing                                       | A | 40099          | 217(176;268)           |

**Table S2.** 14-Day incidence of COVID-19 of 10 sectors with the highest incidence at Level 2 on both periods prior to the 19th October non-pharmaceutical interventions

| 29 September–12 October 2020                                                |           |                |                     |
|-----------------------------------------------------------------------------|-----------|----------------|---------------------|
| DESCRIPTION                                                                 | NACE Code | Employees      | Incidence (95%CI)   |
| Sports activities, amusement and recreation activities                      | 93        | 26911          | 955(846;1078)       |
| Human health activities                                                     | 86        | 261154         | 780(747;814)        |
| Creative, arts and entertainment activities                                 | 90        | 21922          | 739(634;861)        |
| Food and beverage service activities                                        | 56        | 191978         | 723(686;762)        |
| Residential care activities                                                 | 87        | 162464         | 698(659;740)        |
| Accommodation                                                               | 55        | 27454          | 652(563;754)        |
| Activities of membership organisations                                      | 94        | 47887          | 639(571;714)        |
| Activities auxiliary to financial services and insurance activities         | 66        | 30351          | 626(543;721)        |
| Security and investigation activities                                       | 80        | 20096          | 622(522;741)        |
| Office administrative, office support and other business support activities | 82        | 36731          | 618(543;704)        |
| <b>All sectors</b>                                                          |           | <b>4390750</b> | <b>573(566;580)</b> |
| <b>General population</b>                                                   |           |                | <b>423</b>          |
| 6–19 October 2020                                                           |           |                |                     |
| DESCRIPTION                                                                 | NACE Code | Employees      | Incidence (95%CI)   |
| Sports activities, amusement and recreation activities                      | 93        | 26687          | 1660(1513;1820)     |

|                                                               |          |                |                        |
|---------------------------------------------------------------|----------|----------------|------------------------|
| Human health activities                                       | 86       | 261680         | 1631(1583;1680)        |
| Residential care activities                                   | 87       | 162476         | 1543(1484;1604)        |
| Food and beverage service activities                          | 56       | 189940         | 1342(1291;1395)        |
| Public administration and defence; compulsory social security | 84       | 542998         | 1321(1291;1352)        |
| Security and investigation activities                         | 80       | 20015          | 1304(1156;1471)        |
| Education                                                     | 85       | 534158         | 1294(1264;1325)        |
| Activities auxiliary to financial services                    | 66 and   | 30322          | 1273(1153;1406)        |
| insurance activities                                          |          |                |                        |
| Real estate activities                                        | 68       | 24582          | 1257(1125;1404)        |
| Office administrative, office support and                     | 82 other | 37037          | 1242(1134;1360)        |
| business support activities                                   |          |                |                        |
| <b>All sectors</b>                                            |          | <b>4390832</b> | <b>1178(1168;1188)</b> |
| <b>General population</b>                                     |          |                | <b>816</b>             |

**Table S3.** 14-Day incidence of COVID-19 in sectors with the highest incidence at Level 3 on both periods prior to the 19th October non-pharmaceutical interventions

| 29 September–12 October 2020                             |           |                |                      |
|----------------------------------------------------------|-----------|----------------|----------------------|
| DESCRIPTION                                              | NACE Code | Employees      | Incidence<br>(95%CI) |
| Sports activities                                        | 931       | 21131          | 1008(882;1152)       |
| Other residential care activities                        | 879       | 15412          | 837(705;994)         |
| Hospital activities                                      | 861       | 210745         | 819(781;858)         |
| Hotels and similar accommodation                         | 551       | 20076          | 792(678;925)         |
| Residential care activities for the elderly and disabled | 873       | 66667          | 786(722;856)         |
| Restaurants and mobile food service activities           | 561       | 149471         | 756(713;801)         |
| Activities of call centres                               | 822       | 10133          | 750(599;938)         |
| Creative, arts and entertainment activities              | 900       | 21922          | 739(634;861)         |
| Other passenger land transport                           | 493       | 40751          | 719(641;806)         |
| Medical and dental practice activities                   | 862       | 22695          | 705(604;823)         |
| <b>All sectors</b>                                       |           | <b>4390750</b> | <b>573(566;580)</b>  |
| <b>General population</b>                                |           |                | <b>423</b>           |
| 6–19 October 2020                                        |           |                |                      |
| DESCRIPTION                                              | NACE Code | Employees      | Incidence<br>(95%CI) |
| Sports activities                                        | 931       | 21062          | 1752(1583;1938)      |
| Residential care activities for the elderly and disabled | 873       | 66609          | 1746(1649;1848)      |
| Hospital activities                                      | 861       | 210960         | 1688(1634;1744)      |
| Other residential care activities                        | 879       | 15472          | 1577(1392;1786)      |
| Medical and dental practice activities                   | 862       | 22765          | 1454(1306;1618)      |
| Office administrative and support activities             | 821       | 11777          | 1435(1235;1666)      |
| Secondary education                                      | 853       | 404968         | 1409(1373;1446)      |

|                                                                                       |     |                |                        |
|---------------------------------------------------------------------------------------|-----|----------------|------------------------|
| Residential care activities for mental retardation, mental health and substance abuse | 872 | 39972          | 1406(1295;1526)        |
| Beverage serving activities                                                           | 563 | 19500          | 1400(1244;1575)        |
| Activities of call centres                                                            | 822 | 10367          | 1389(1181;1633)        |
| <b>All sectors</b>                                                                    |     | <b>4390832</b> | <b>1178(1168;1188)</b> |
| <b>General population</b>                                                             |     |                | <b>816</b>             |

**Table S4.** 14-Day incidence of COVID-19 in sectors with the highest incidence at Level 4 on both periods prior to the 19th October non-pharmaceutical interventions

| 29 September–12 October 2020                             |           |                |                        |
|----------------------------------------------------------|-----------|----------------|------------------------|
| DESCRIPTION                                              | NACE code | Employees      | Incidence (95%CI)      |
| Activities of sports clubs                               | 9312      | 5954           | 1394(1126;1725)        |
| Other human resources provision                          | 7830      | 4320           | 1250(959;1629)         |
| Fitness facilities                                       | 9313      | 3707           | 1187(884;1591)         |
| Other retail sale of food in specialised stores          | 4729      | 3312           | 1117(810;1538)         |
| Other sports activities                                  | 9319      | 3220           | 1087(781;1510)         |
| Performing arts                                          | 9001      | 5196           | 1020(780;1333)         |
| Other amusement and recreation activities                | 9329      | 3398           | 883(618;1260)          |
| Manufacture of air and spacecraft and related machinery  | 3030      | 5257           | 875(656;1166)          |
| Other residential care activities                        | 8790      | 15412          | 837(705;994)           |
| Service activities incidental to air transportation      | 5223      | 5968           | 821(621;1085)          |
| <b>All sectors</b>                                       |           | <b>4390750</b> | <b>573(566;580)</b>    |
| <b>General population</b>                                |           |                | <b>423</b>             |
| 6–19 October 2020                                        |           |                |                        |
| DESCRIPTION                                              | NACE code | Employees      | Incidence (95%CI)      |
| Other human resources provision                          | 7830      | 4326           | 2381(1967;2880)        |
| Activities of sports clubs                               | 9312      | 5875           | 2349(1991;2769)        |
| Other sports activities                                  | 9319      | 3208           | 1964(1537;2506)        |
| Child day-care activities                                | 8891      | 25658          | 1824(1667;1995)        |
| Other retail sale of food in specialised stores          | 4729      | 3305           | 1785(1385;2297)        |
| Fitness facilities                                       | 9313      | 3741           | 1764(1388;2239)        |
| Residential care activities for the elderly and disabled | 8730      | 66609          | 1746(1649;1848)        |
| Other credit granting                                    | 6492      | 3230           | 1734(1337;2247)        |
| Manufacture of air and spacecraft and related machinery  | 3030      | 5251           | 1714(1396;2103)        |
| Public order and safety activities                       | 8424      | 53021          | 1688(1582;1801)        |
| <b>All sectors</b>                                       |           | <b>4390832</b> | <b>1178(1168;1188)</b> |
| <b>General population</b>                                |           |                | <b>816</b>             |

**Table S5.** 14-Day incidence of COVID-19 in sectors with the highest incidence at Level 5 on both periods prior to the 19th October non-pharmaceutical interventions

| 29 September–12 October 2020                     |           |                |                        |
|--------------------------------------------------|-----------|----------------|------------------------|
| DESCRIPTION                                      | NACE Code | Employees      | Incidence<br>(95%CI)   |
| Activities of football clubs                     | 93121     | 3605           | 1609(1246;2076)        |
| Activities of leagues and sports federations     | 93191     | 1961           | 1428(988;2060)         |
| Other human resources provision                  | 78300     | 4320           | 1250(959;1629)         |
| Fitness facilities                               | 93130     | 3707           | 1187(884;1591)         |
| Other retail trade of food in specialised stores | 47299     | 2857           | 1155(822;1620)         |
| General ordinary secondary education             | 85311     | 159055         | 1143(1092;1196)        |
| General construction of office buildings         | 41202     | 1756           | 1139(736;1759)         |
| General social services with accommodation       | 87902     | 2500           | 1080(742;1570)         |
| Production of shows by artistic ensembles        | 90012     | 4924           | 1056(806;1383)         |
| Other cleaning activities                        | 81290     | 2846           | 1019(709;1463)         |
| <b>All sectors</b>                               |           | <b>4390750</b> | <b>573(566;580)</b>    |
| <b>General population</b>                        |           |                | <b>423</b>             |
| 6–19 October 2020                                |           |                |                        |
| DESCRIPTION                                      | NACE Code | Employees      | Incidence<br>(95%CI)   |
| Manufacture of weapons and ammunition            | 25400     | 2183           | 2657(2060;3422)        |
| General construction of office buildings         | 41202     | 1761           | 2556(1914;3406)        |
| General ordinary secondary education             | 85311     | 159806         | 2478(2403;2555)        |
| Other human resources provision                  | 78300     | 4326           | 2381(1967;2880)        |
| Activities of football clubs                     | 93121     | 3556           | 2250(1811;2793)        |
| Activities of leagues and sports federations     | 93191     | 1956           | 2250(1678;3010)        |
| Distribution of gaseous fuels through mains      | 35220     | 1881           | 2126(1563;2886)        |
| Activities of medical laboratories               | 86901     | 5159           | 1977(1631;2395)        |
| Nurseries and day-care centres                   | 88911     | 22564          | 1950(1778;2139)        |
| Motion picture projection activities             | 59140     | 1633           | 1837(1287;2615)        |
| <b>All sectors</b>                               |           | <b>4390832</b> | <b>1178(1168;1188)</b> |
| <b>General population</b>                        |           |                | <b>816</b>             |

Mean number of high risk contacts per index case from  
29/10/2020 until 18/02/2021

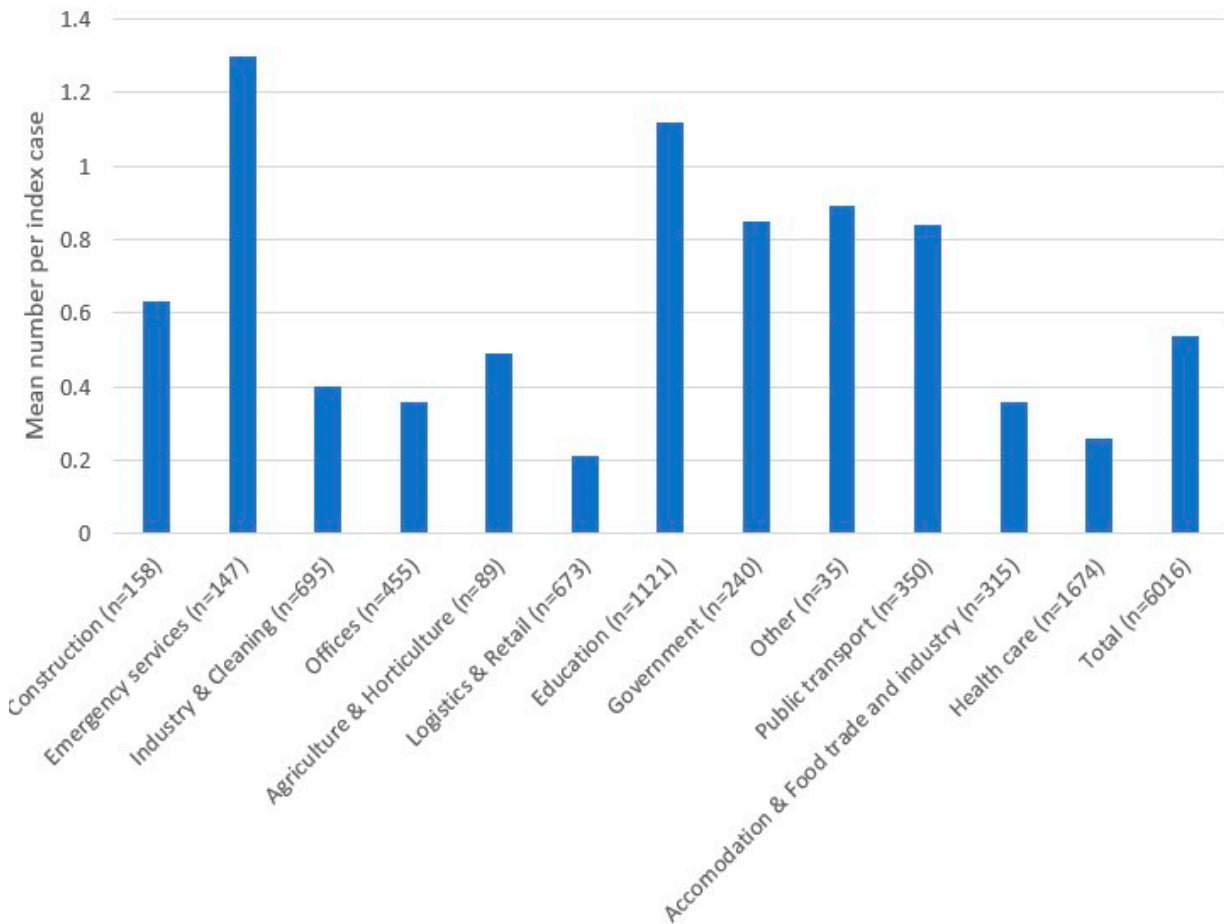

**Figure S1.** The mean number of high-risk contacts per index case by segments under surveillance
